# Supplementary material for: A combined computational and experimental study of the [Co(bpy)3]2+/3+ complexes as one-electron outer-sphere redox couples in dye-sensitized solar cell electrolyte media
Source: Royal Society of Chemistry journal article supplement (doi:10.1039/c3cp55034f), 2014-01-01
Supplement: c3cp55034f1.pdf [file c3cp55034f1.pdf]

|                                                                   |           |         |         |         |         |         |         |         |         |
|-------------------------------------------------------------------|-----------|---------|---------|---------|---------|---------|---------|---------|---------|
| $\gamma$ C-H<br>in-plane<br>C-H<br>bending                        |           | 767.95  | 771.60  | 809.92  | 810.93  | 767.99  | 768.84  | 796.51  | 796.51  |
|                                                                   |           | 769.77  | 771.96  | 810.93  | 811.01  | 768.84  | 770.96  | 798.05  | 798.05  |
|                                                                   |           | 769.98  | 773.71  | 811.01  |         | 771.45  | 791.85  | 799.58  | 799.58  |
|                                                                   |           | 771.60  |         |         |         | 772.02  | 792.44  |         | 935.99  |
|                                                                   |           | 771.96  |         |         |         | 791.85  |         |         | 941.43  |
|                                                                   |           |         |         |         | 792.44  |         |         |         |         |
| in-plane<br>ring bending                                          | 765 (29)  | 791.07  | 791.07  | 1037.91 | 1038.22 | 791.91  | 791.91  | 1044.69 | 1044.69 |
|                                                                   |           | 791.23  | 791.23  | 1038.22 | 1060.52 | 791.99  | 791.99  | 1044.85 | 1044.85 |
|                                                                   |           |         | 791.68  | 1060.52 | 1063.33 | 792.36  | 792.36  | 1045.46 | 1045.46 |
|                                                                   |           |         |         | 1082.98 | 1082.98 | 792.54  | 792.54  |         |         |
|                                                                   |           |         |         | 1084.52 | 1084.52 |         |         |         |         |
| $\gamma$ C-H<br>in-plane<br>C-C-H<br>bending                      | 908 (21)  | 801.30  | 801.57  |         |         |         | 853.54  | 1065.31 | 1065.31 |
|                                                                   | 778 (100) | 801.57  | 802.15  |         |         |         | 930.22  |         |         |
|                                                                   |           | 802.15  | 939.00  |         |         |         | 937.16  |         |         |
|                                                                   |           | 942.68  | 942.68  |         |         |         |         |         |         |
|                                                                   |           | 943.37  | 943.37  |         |         |         |         |         |         |
| in-plane ring<br>and C-H<br>bending                               | 1018 (71) | 1026.95 | 1026.95 | 1098.88 | 1098.88 | 1028.70 | 1028.70 | 1065.57 | 1065.57 |
|                                                                   |           | 1027.14 | 1027.14 | 1100.67 | 1100.67 | 1029.07 | 1029.07 | 1065.91 | 1065.91 |
|                                                                   |           | 1028.82 | 1040.85 | 1109.08 | 1152.87 | 1030.48 | 1030.48 | 1067.80 | 1067.80 |
|                                                                   |           | 1040.85 | 1041.29 | 1152.33 | 1234.28 | 1042.51 | 1042.51 | 1085.92 | 1068.26 |
|                                                                   |           | 1041.29 | 1045.45 | 1234.28 |         | 1042.60 | 1042.60 | 1086.52 | 1085.92 |
|                                                                   |           |         |         | 1234.63 |         |         | 1045.86 | 1087.65 | 1086.52 |
|                                                                   |           |         | 1242.53 |         |         |         |         | 1087.65 |         |
| in-plane ring<br>bending                                          | 1062 (32) | 1076.15 | 1077.15 |         |         | 1075.96 | 1093.11 | 1102.07 | 1102.07 |
|                                                                   | 1040 (14) | 1093.58 | 1093.58 |         |         | 1076.84 | 1093.48 | 1104.36 | 1104.36 |
|                                                                   |           | 1093.75 | 1093.75 |         |         | 1077.02 | 1093.88 | 1105.28 | 1105.28 |
|                                                                   |           | 1094.10 | 1094.10 |         |         | 1093.11 |         | 1109.51 | 1109.51 |
|                                                                   |           |         |         |         |         | 1093.48 |         | 1111.36 | 1111.36 |
|                                                                   |           |         |         |         | 1093.88 |         | 1111.91 | 1111.91 |         |
| in-plane ring<br>and C-H<br>bending                               | 1100 (26) | 1147.60 | 1147.60 | 1306.71 | 1306.71 | 1146.12 | 1146.12 | 1153.70 | 1153.70 |
|                                                                   |           | 1147.82 | 1147.92 | 1310.55 | 1313.22 | 1146.39 | 1146.39 | 1154.28 | 1154.28 |
|                                                                   |           |         |         | 1313.22 | 1315.11 | 1146.64 | 1146.64 | 1156.14 | 1156.14 |
|                                                                   |           |         |         | 1315.11 |         |         |         | 1156.14 | 1173.34 |
| in-plane C-H<br>bending                                           | 1179 (30) | 1162.67 | 1227.09 | 1365.05 | 1380.65 | 1161.70 | 1161.70 | 1225.14 | 1225.14 |
|                                                                   | 1160 (47) | 1162.86 | 1227.63 | 1366.04 | 1381.00 | 1161.90 | 1161.90 | 1225.73 | 1225.73 |
|                                                                   |           | 1163.63 | 1227.82 | 1368.60 | 1381.69 | 1162.49 | 1219.63 | 1226.44 | 1226.44 |
|                                                                   |           | 1227.09 | 1238.78 | 1380.65 |         | 1219.63 | 1219.99 | 1234.35 | 1234.35 |
|                                                                   |           | 1227.63 | 1238.95 | 1381.00 |         | 1219.99 | 1220.79 | 1234.85 | 1234.85 |
|                                                                   |           | 1227.82 | 1239.50 |         |         | 1220.79 | 1230.71 | 1237.53 | 1237.53 |
|                                                                   |           | 1238.78 |         |         |         | 1230.71 | 1231.32 |         |         |
|                                                                   |           | 1238.95 |         |         |         | 1231.32 |         |         |         |
| $\nu$ C-C, $\nu$ C-N<br>stretching<br>and in-plane<br>C-H bending | 1490 (30) | 1307.99 | 1307.99 | 1485.33 | 1482.69 | 1308.27 | 1308.27 | 1308.87 | 1308.87 |
|                                                                   | 1470 (39) | 1308.15 | 1308.15 | 1486.13 | 1485.33 | 1308.42 | 1308.42 | 1311.96 | 1311.96 |
|                                                                   | 1442 (75) | 1309.12 | 1309.12 | 1502.63 | 1486.13 | 1308.91 | 1308.91 | 1314.62 | 1314.62 |
|                                                                   | 1312 (45) | 1315.51 | 1315.51 | 1502.73 | 1516.80 | 1314.88 | 1314.71 | 1316.16 | 1316.16 |
|                                                                   | 1284 (11) | 1315.65 | 1315.65 | 1503.68 | 1517.47 | 1334.96 | 1314.88 | 1319.84 | 1319.84 |
|                                                                   | 1249 (20) | 1361.85 | 1319.05 | 1510.73 | 1544.79 | 1361.62 | 1318.38 | 1341.12 | 1327.36 |
|                                                                   | 1230 (17) | 1361.94 | 1333.90 | 1516.80 | 1546.53 | 1362.56 | 1334.37 | 1345.23 | 1341.12 |
|                                                                   |           | 1362.92 | 1334.28 | 1517.47 | 1547.26 | 1363.20 | 1334.96 | 1345.69 | 1345.23 |
|                                                                   |           | 1363.62 | 1335.56 | 1546.53 | 1610.65 | 1364.07 | 1335.94 | 1366.96 | 1345.69 |
|                                                                   |           | 1363.86 | 1361.85 | 1547.26 | 1610.85 | 1365.98 | 1361.62 | 1369.54 | 1366.96 |
|                                                                   |           | 1364.49 | 1361.94 | 1610.85 | 1611.06 | 1366.08 | 1362.56 | 1371.47 | 1369.54 |
|                                                                   |           | 1482.01 | 1362.92 | 1611.06 | 1643.32 | 1482.75 | 1363.20 | 1383.90 | 1383.90 |
|                                                                   |           | 1482.24 | 1363.62 | 1643.32 | 1643.59 | 1482.85 | 1364.07 | 1384.75 | 1384.75 |
|                                                                   |           | 1497.53 | 1363.86 | 1643.59 | 1643.87 | 1496.38 | 1365.98 | 1390.23 | 1390.23 |
|                                                                   |           | 1497.62 | 1364.49 | 1643.87 | 1644.11 | 1496.67 | 1366.08 | 1485.49 | 1485.49 |
|                                                                   |           | 1497.86 | 1480.60 | 1645.43 | 1645.43 | 1515.01 | 1480.96 | 1488.73 | 1488.73 |

|                            |           |         |         |         |         |         |         |         |         |
|----------------------------|-----------|---------|---------|---------|---------|---------|---------|---------|---------|
|                            |           | 1514.63 | 1482.01 | 1645.60 | 1645.60 | 1518.34 | 1482.75 | 1490.04 | 1490.04 |
|                            |           | 1517.26 | 1482.24 |         |         | 1536.52 | 1482.85 | 1503.53 | 1503.53 |
|                            |           | 1517.39 | 1497.53 |         |         | 1537.24 | 1518.34 | 1504.31 | 1504.31 |
|                            |           | 1537.41 | 1497.62 |         |         | 1537.53 | 1536.52 | 1504.61 | 1520.51 |
|                            |           | 1537.50 | 1497.86 |         |         |         | 1537.24 | 1514.57 | 1522.08 |
|                            |           |         | 1514.63 |         |         |         | 1537.53 | 1520.51 | 1548.96 |
|                            |           |         | 1517.26 |         |         |         |         | 1522.08 | 1551.12 |
|                            |           |         | 1517.39 |         |         |         |         | 1548.96 | 1552.99 |
|                            |           |         | 1536.72 |         |         |         |         | 1551.12 |         |
|                            |           |         | 1537.41 |         |         |         |         | 1552.99 |         |
|                            |           |         | 1537.50 |         |         |         |         |         |         |
|                            |           |         | 1614.45 |         |         |         |         |         |         |
|                            | 1570 (26) | 1614.65 | 1614.65 |         |         | 1615.78 | 1615.51 | 1616.68 | 1616.68 |
|                            |           | 1614.75 | 1614.75 |         |         | 1615.85 | 1615.78 | 1616.93 | 1616.93 |
|                            |           | 1622.90 |         |         |         | 1624.25 | 1615.85 | 1617.32 | 1617.32 |
|                            |           | 1623.02 |         |         |         | 1624.32 |         | 1621.81 | 1621.81 |
|                            |           | 1623.97 |         |         |         | 1624.62 |         | 1622.19 | 1622.19 |
| v C-C, v C-N<br>Stretching |           |         |         |         |         |         |         | 1622.57 | 1651.40 |
|                            |           |         |         |         |         |         |         | 1651.40 | 1651.92 |
|                            |           |         |         |         |         |         |         | 1651.92 | 1652.74 |
|                            |           |         |         |         |         |         |         | 1652.74 | 1653.17 |
|                            |           |         |         |         |         |         |         | 1653.17 | 1654.63 |
|                            |           |         |         |         |         |         |         | 1654.63 | 1654.90 |
|                            |           |         |         |         |         |         |         | 1654.90 |         |
|                            | 1600 (72) | 1642.99 | 1642.99 |         |         | 1644.39 | 1644.39 |         |         |
|                            |           | 1643.23 | 1643.23 |         |         | 1644.68 | 1644.68 |         |         |
|                            |           | 1643.30 | 1643.30 |         |         | 1644.95 | 1644.95 |         |         |
|                            |           | 1645.87 | 1646.94 |         |         | 1647.31 | 1647.31 |         |         |
|                            |           | 1646.94 | 1646.98 |         |         | 1648.19 | 1648.19 |         |         |
|                            |           | 1646.98 |         |         |         | 1648.46 | 1648.46 |         |         |
|                            |           | 3233.01 | 3233.01 | 3241.95 | 3240.34 | 3234.31 | 3234.31 | 3248.72 | 3248.72 |
|                            |           | 3233.07 | 3233.07 | 3242.38 | 3240.69 | 3234.33 | 3234.33 | 3249.52 | 3249.52 |
|                            |           | 3233.17 | 3233.17 | 3242.42 | 3240.72 | 3234.52 | 3234.52 | 3249.79 | 3249.79 |
|                            |           | 3242.24 | 3234.36 | 3250.26 | 3241.95 | 3235.56 | 3235.56 | 3250.77 | 3250.77 |
|                            |           | 3250.15 | 3234.39 | 3250.47 | 3242.38 | 3235.71 | 3235.71 | 3250.83 | 3250.83 |
|                            |           | 3250.44 | 3234.49 | 3250.56 | 3242.42 | 3235.97 | 3235.97 | 3251.22 | 3251.22 |
|                            |           | 3250.80 | 3242.01 | 3257.37 | 3250.26 | 3247.04 | 3247.04 | 3291.50 | 3262.63 |
|                            |           | 3256.61 | 3242.05 | 3257.74 | 3250.47 | 3247.42 | 3247.42 | 3294.54 | 3262.73 |
|                            |           | 3256.80 | 3242.24 | 3257.77 | 3250.56 | 3247.66 | 3247.66 | 3297.28 | 3265.40 |
|                            |           | 3259.01 | 3243.29 | 3263.74 | 3253.97 | 3248.69 | 3248.69 | 3299.50 | 3265.50 |
|                            |           |         | 3243.47 | 3263.80 | 3245.37 | 3248.84 | 3248.84 | 3302.05 | 3266.33 |
|                            |           |         | 3243.64 | 3263.93 | 3245.41 | 3248.88 | 3248.88 | 3314.24 | 3267.59 |
| v C-H<br>Stretching        |           |         | 3250.15 |         | 3257.37 | 3253.27 | 3253.27 |         | 3269.14 |
|                            |           |         | 3250.44 |         | 3257.74 | 3254.82 | 3254.82 |         | 3269.22 |
|                            |           |         | 3250.80 |         | 3257.77 | 3255.07 | 3255.07 |         | 3271.62 |
|                            |           |         | 3256.61 |         | 3263.74 | 3261.87 | 3261.87 |         | 3276.98 |
|                            |           |         | 3256.80 |         | 3263.80 | 3261.94 | 3261.94 |         | 3277.69 |
|                            |           |         | 3256.95 |         | 3263.93 | 3262.16 | 3262.16 |         | 3278.05 |
|                            |           |         | 3258.70 |         | 3289.52 | 3263.40 | 3263.40 |         | 3291.50 |
|                            |           |         | 3258.82 |         | 3290.10 | 3263.70 | 3263.70 |         | 3294.54 |
|                            |           |         | 3264.45 |         | 3290.26 | 3263.88 | 3263.88 |         | 3297.28 |
|                            |           |         | 3264.63 |         | 3290.45 | 3267.80 | 3267.80 |         | 3299.50 |
|                            |           |         | 3264.94 |         | 3291.30 | 3267.98 | 3267.98 |         | 3302.05 |
|                            |           |         |         |         | 3292.10 | 3268.64 | 3268.64 |         | 3314.24 |

<sup>a</sup> For the notations and assignments see Ref. [53]
